# Supplementary material
Source: Springer Nature journal article supplement (https://www.springermedizin.de/resource/supplementary/12895_2012_148_MOESM1_ESM.pdf/9514234)

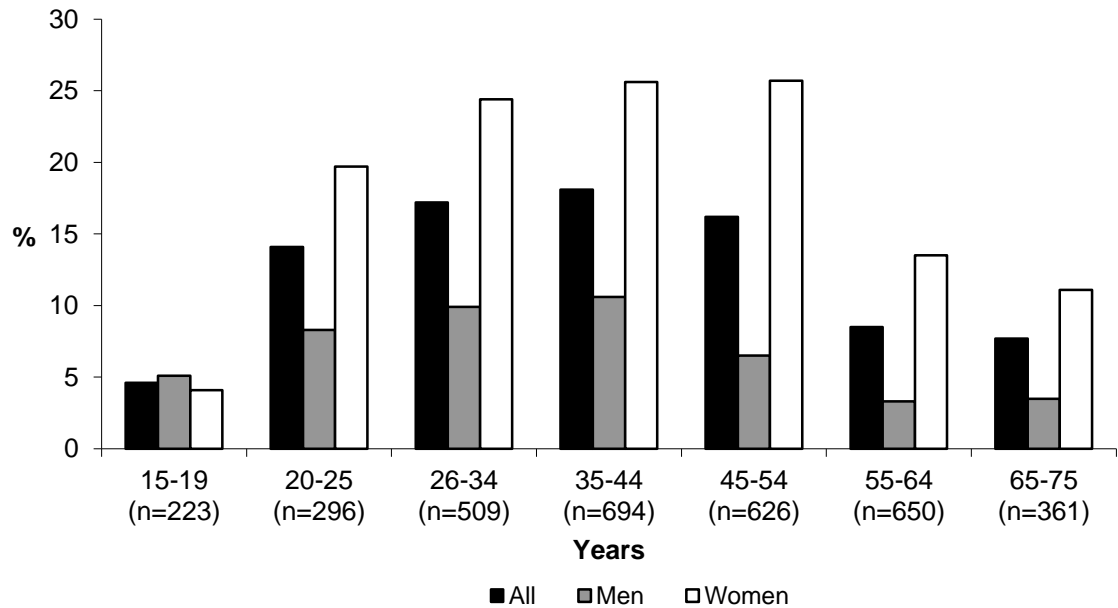

Supplement: MOESM1 [file 9514234]
